# Supplementary material for: Prognostic Factors of Survival for High-Grade Neuroendocrine Neoplasia of the Bladder: A SEER Database Analysis
Source: MDPI journal article supplement (doi:10.3390/curroncol29080461), 2022-08-18
Supplement: s1 [file s1]

# Supplementary Materials: Prognostic Factors of Survival for High-Grade Neuroendocrine Neoplasia of the Bladder: A SEER Database Analysis

Veronica Mollica, Francesco Massari, Elisa Andrini, Matteo Rosellini, Andrea Marchetti, Giacomo Nuvola, Elisa Tassinari, Giuseppe Lamberti and Davide Campana

**Table S1.** Patients with no lymph node involvement nor metastatic lesions (N0M0) characteristics (total number of patients = 510).

|                            |           |                         |
|----------------------------|-----------|-------------------------|
| <b>Age</b>                 | ≤72 years | 43.7% ( <i>n</i> = 223) |
|                            | >72 years | 56.3% ( <i>n</i> = 287) |
| <b>Sex</b>                 | Female    | 19.8% ( <i>n</i> = 101) |
|                            | Male      | 80.2% ( <i>n</i> = 409) |
| <b>Histology</b>           | SCNEC     | 75.3% ( <i>n</i> = 384) |
|                            | NEC       | 13.5% ( <i>n</i> = 69)  |
|                            | MiNEN     | 7.8% ( <i>n</i> = 40)   |
|                            | LCNEC     | 3.3% ( <i>n</i> = 17)   |
| <b>Type of surgery</b>     | Minor     | 80% ( <i>n</i> = 391)   |
|                            | Major     | 20% ( <i>n</i> = 98)    |
|                            | NA        | 23.4% ( <i>n</i> = 265) |
| <b>Status at 12 months</b> | Dead      | 40.3% ( <i>n</i> = 190) |
|                            | Alive     | 59.7% ( <i>n</i> = 282) |

Abbreviations: N, number of patients. NA, not available. SCNEC, small cell neuroendocrine carcinoma. LCNEC, large cell neuroendocrine carcinoma. MiNEN, mixed neuroendocrine non-neuroendocrine neoplasia. NEC, neuroendocrine carcinoma.

**Table S2.** Univariate and multivariate Cox proportional hazard models for the risk of death. Significant p-values are highlighted in bold.

|                   | <b>Univariate</b> |              |                 | <b>Multivariate</b> |              |                 |
|-------------------|-------------------|--------------|-----------------|---------------------|--------------|-----------------|
|                   | <b>HR</b>         | <b>CI95%</b> | <b><i>p</i></b> | <b>HR</b>           | <b>CI95%</b> | <b><i>p</i></b> |
| Female sex        | 1.03              | 0.80-1.35    | 0.818           | -                   | -            | -               |
| Age >72 years     | 1.96              | 1.57-2.46    | <0.001          | 1.80                | 1.32-2.47    | <0.001          |
| Diameter >44.5 mm | 1.64              | 1.23-2.17    | <0.001          | 1.61                | 1.21-2.15    | 0.001           |
| Minor surgery     | 2.32              | 1.68-3.19    | <0.001          | 1.58                | 1.07-2.35    | 0.021           |

Abbreviations: HR, hazard ratio; 95%CI, 95% confidence interval.

**Table S3.** Patients with lymph node involvement and no metastatic lesions (N+M0) characteristics (total number of patients = 104).

|                        |           |                        |
|------------------------|-----------|------------------------|
| <b>Age</b>             | ≤72 years | 49.0% ( <i>n</i> = 51) |
|                        | >72 years | 51.0% ( <i>n</i> = 53) |
| <b>Sex</b>             | Female    | 18.3% ( <i>n</i> = 19) |
|                        | Male      | 81.7% ( <i>n</i> = 85) |
| <b>Histology</b>       | SCNEC     | 81.7% ( <i>n</i> = 85) |
|                        | NEC       | 6.7% ( <i>n</i> = 7)   |
|                        | MiNEN     | 10.6% ( <i>n</i> = 11) |
|                        | LCNEC     | 1% ( <i>n</i> = 1)     |
| <b>Type of surgery</b> | Minor     | 52.6% ( <i>n</i> = 51) |
|                        | Major     | 47.4% ( <i>n</i> = 46) |
|                        | Dead      | 51.1% ( <i>n</i> = 47) |

|                            |       |                        |
|----------------------------|-------|------------------------|
| <b>Status at 12 months</b> | Alive | 48.9% ( <i>n</i> = 45) |
|----------------------------|-------|------------------------|

Abbreviations: SCNEC, small cell neuroendocrine carcinoma. LCNEC, large cell neuroendocrine carcinoma. MiNEN, mixed neuroendocrine non-neuroendocrine neoplasia. NEC, neuroendocrine carcinoma.

**Table S4.** Univariate and multivariate Cox proportional hazard models for the risk of death. Significant p-values are highlighted in bold.

|                   | <i>Univariate</i> |           |              | <i>Multivariate</i> |           |          |
|-------------------|-------------------|-----------|--------------|---------------------|-----------|----------|
|                   | HR                | CI 95%    | <i>p</i>     | HR                  | CI 95%    | <i>p</i> |
| Female sex        | 1.05              | 0.58-1.90 | 0.875        |                     |           | -        |
| Age >72 years     | 1.66              | 1.07-2.56 | 0.022        |                     |           | NSS      |
| Diameter >44.5 mm | 1.85              | 1.05-3.25 | <b>0.033</b> | 1.88                | 1.07-3.32 | 0.029    |
| Surgery performed | 0.52              | 0.24-1.14 | 0.105        |                     |           | -        |
| Minor surgery     | 1.38              | 0.88-2.17 | 0.159        |                     |           | -        |

Abbreviations: HR, hazard ratio; 95%CI, 95% confidence interval; NSS, not statistically significant.

NSS, not statistically significant.

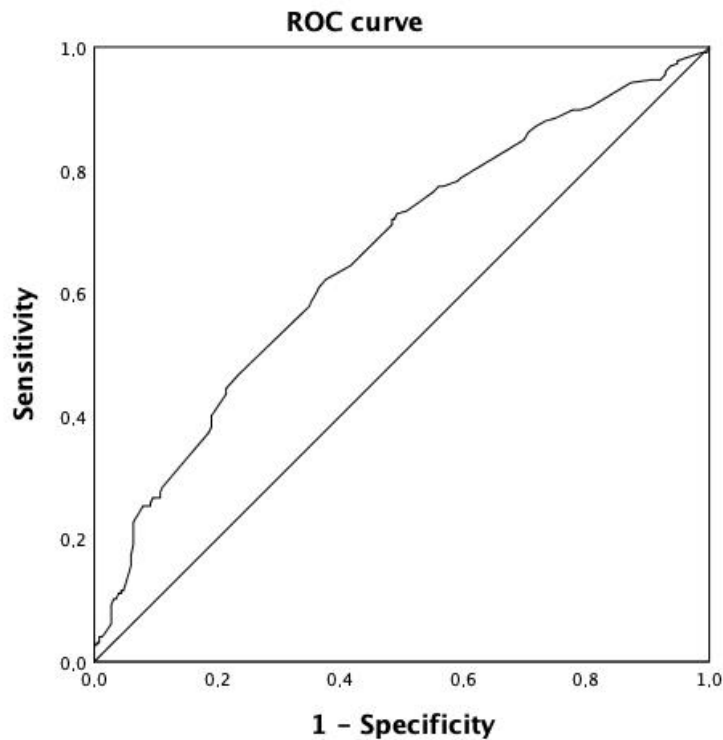

**Figure S1.** Receiving-Operator Characteristics (ROC) curve used to determine the best cut-off of diameter ( $\leq 44.5$  mm or  $>44.5$  mm).

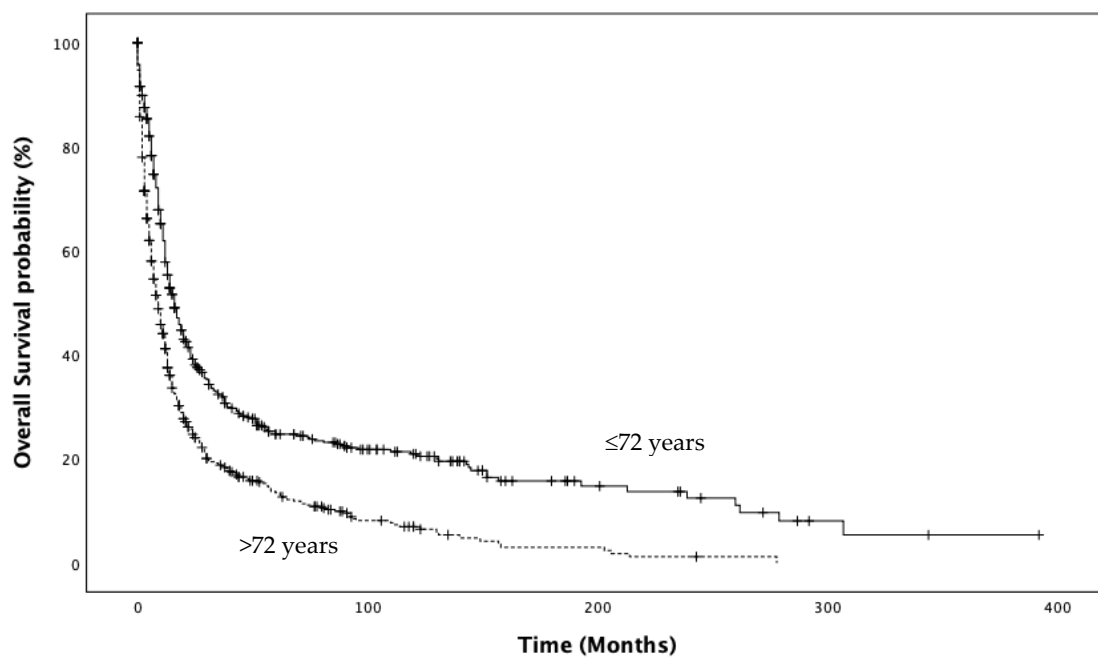

**Figure S2.** Kaplan-Meier estimates of overall survival according to age (72 or  $>72$  years old).

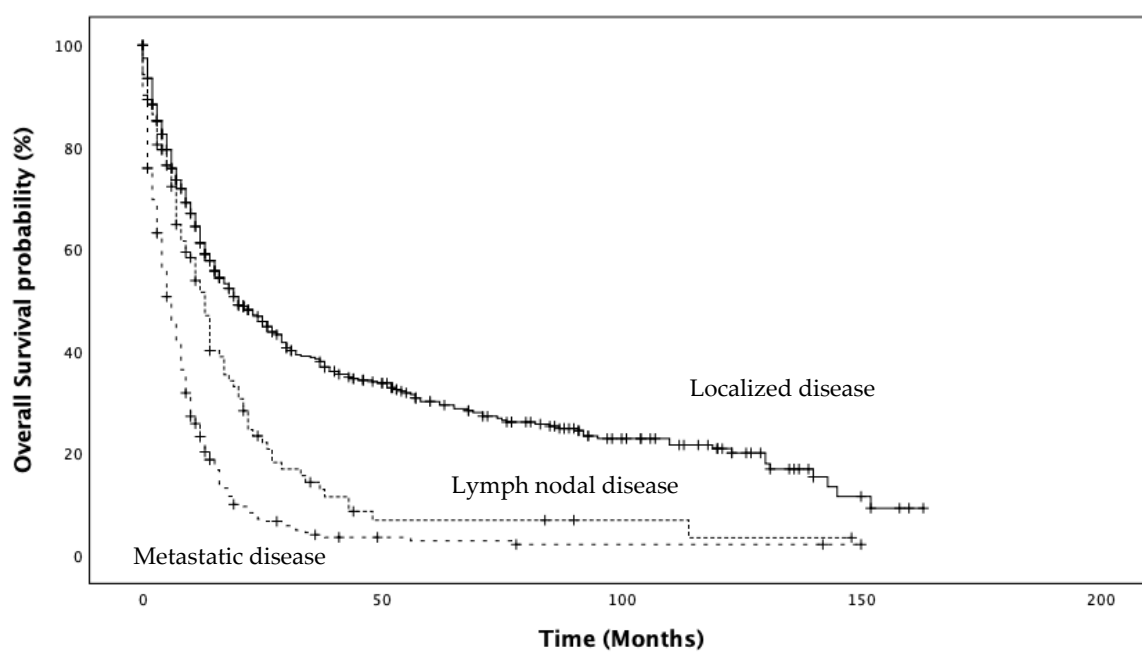

**Figure S3.** Kaplan-Meier estimates of overall survival according to stage (localized, lymph node or distant metastases).

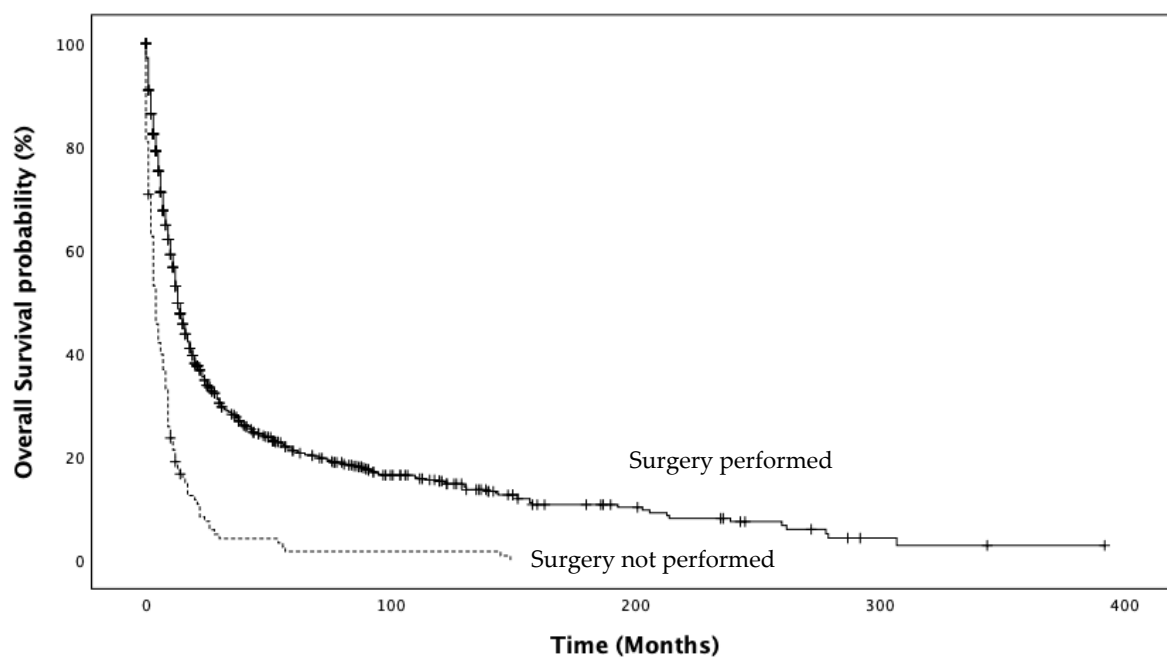

**Figure S4.** Kaplan-Meier estimates of overall survival according to surgery performed or not.

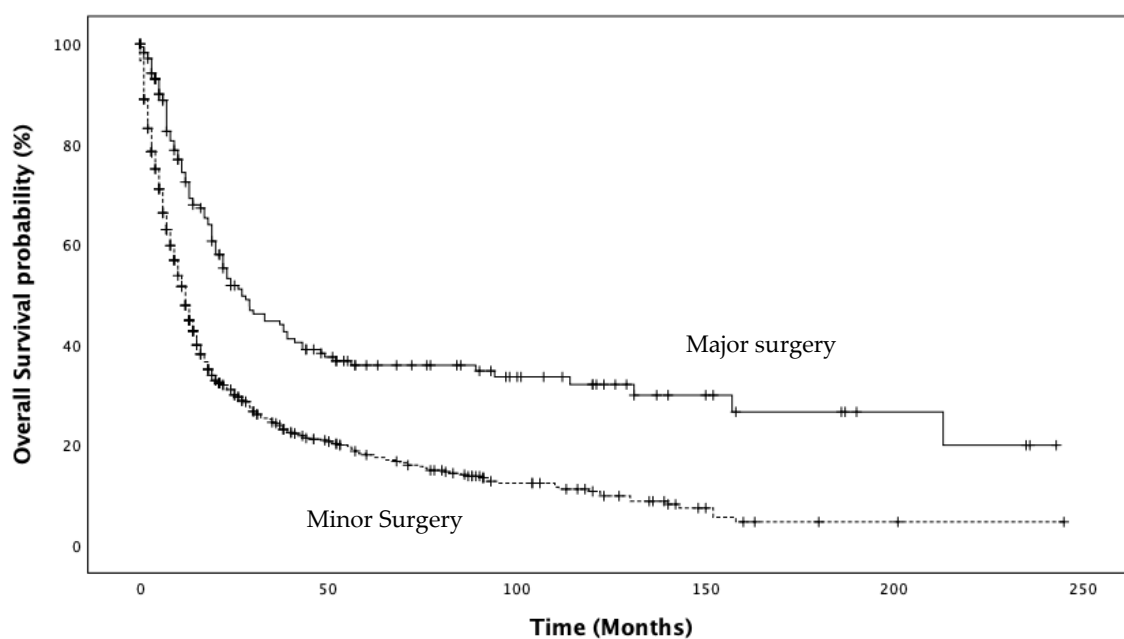

**Figure S5.** Kaplan-Meier estimates of overall survival according to extension of surgery (major or minor).

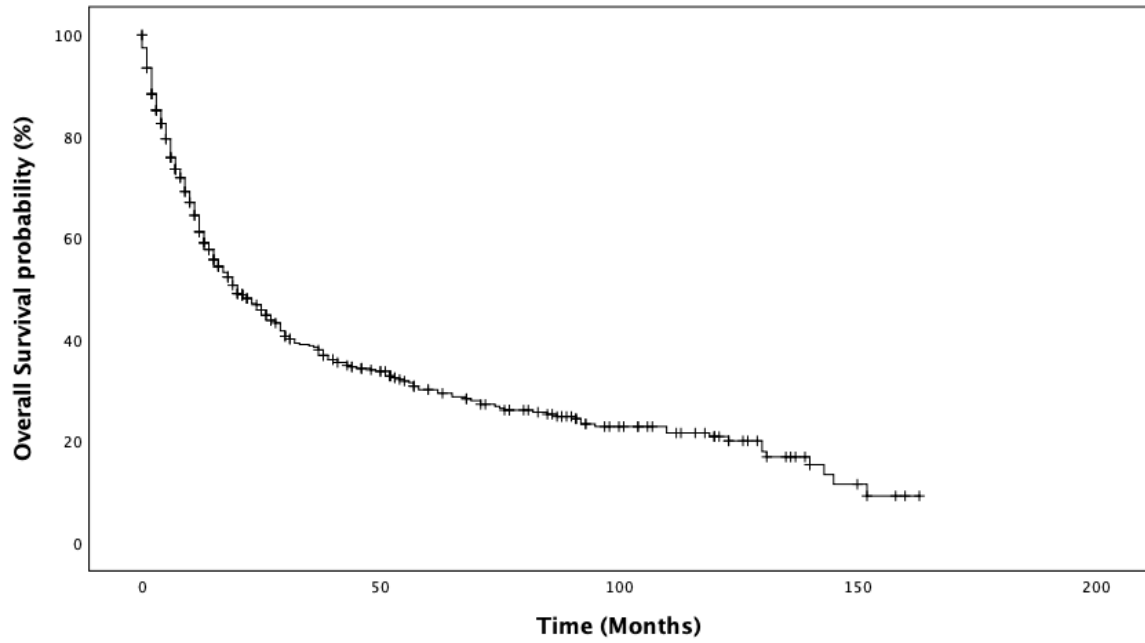

**Figure S6.** Kaplan-Meier estimates of overall survival of N0M0 patients.

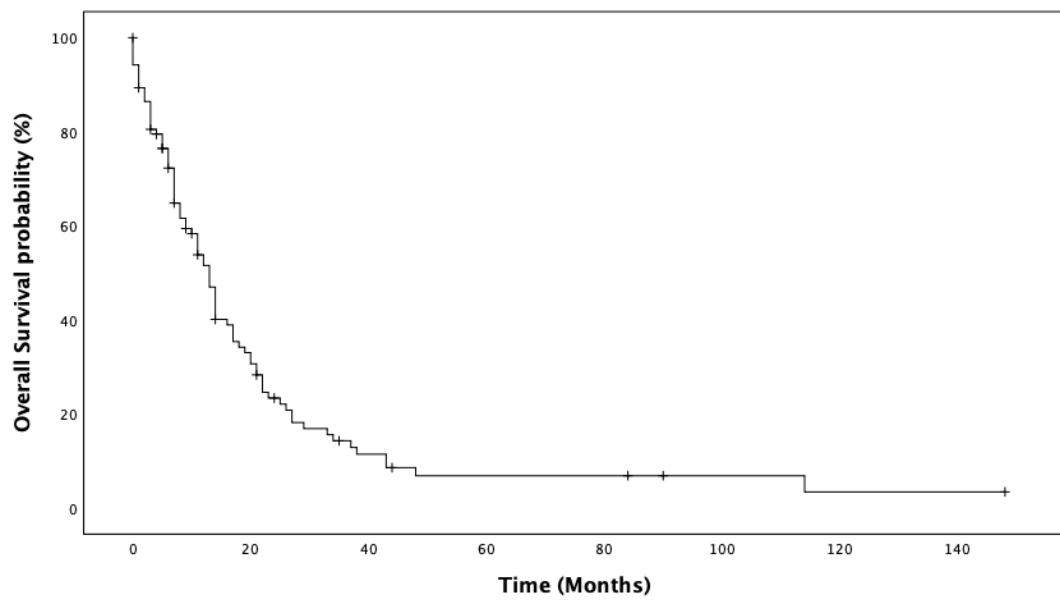

**Figure S7.** Kaplan-Meier estimates of overall survival of N+M0 patients.
